# Supplementary material for: An allelic variant of GAME9 determines its binding capacity with the GAME17 promoter in the regulation of steroidal glycoalkaloid biosynthesis in tomato
Source: PubMed Central journal article supplement (PMC7210767; doi:10.1093/jxb/eraa014), 2020-01-14
Supplement: eraa014_suppl_supplementary_figures_s1_s6_tables_s1_s4.pdf [file eraa014_suppl_supplementary_figures_s1_s6_tables_s1_s4.pdf]

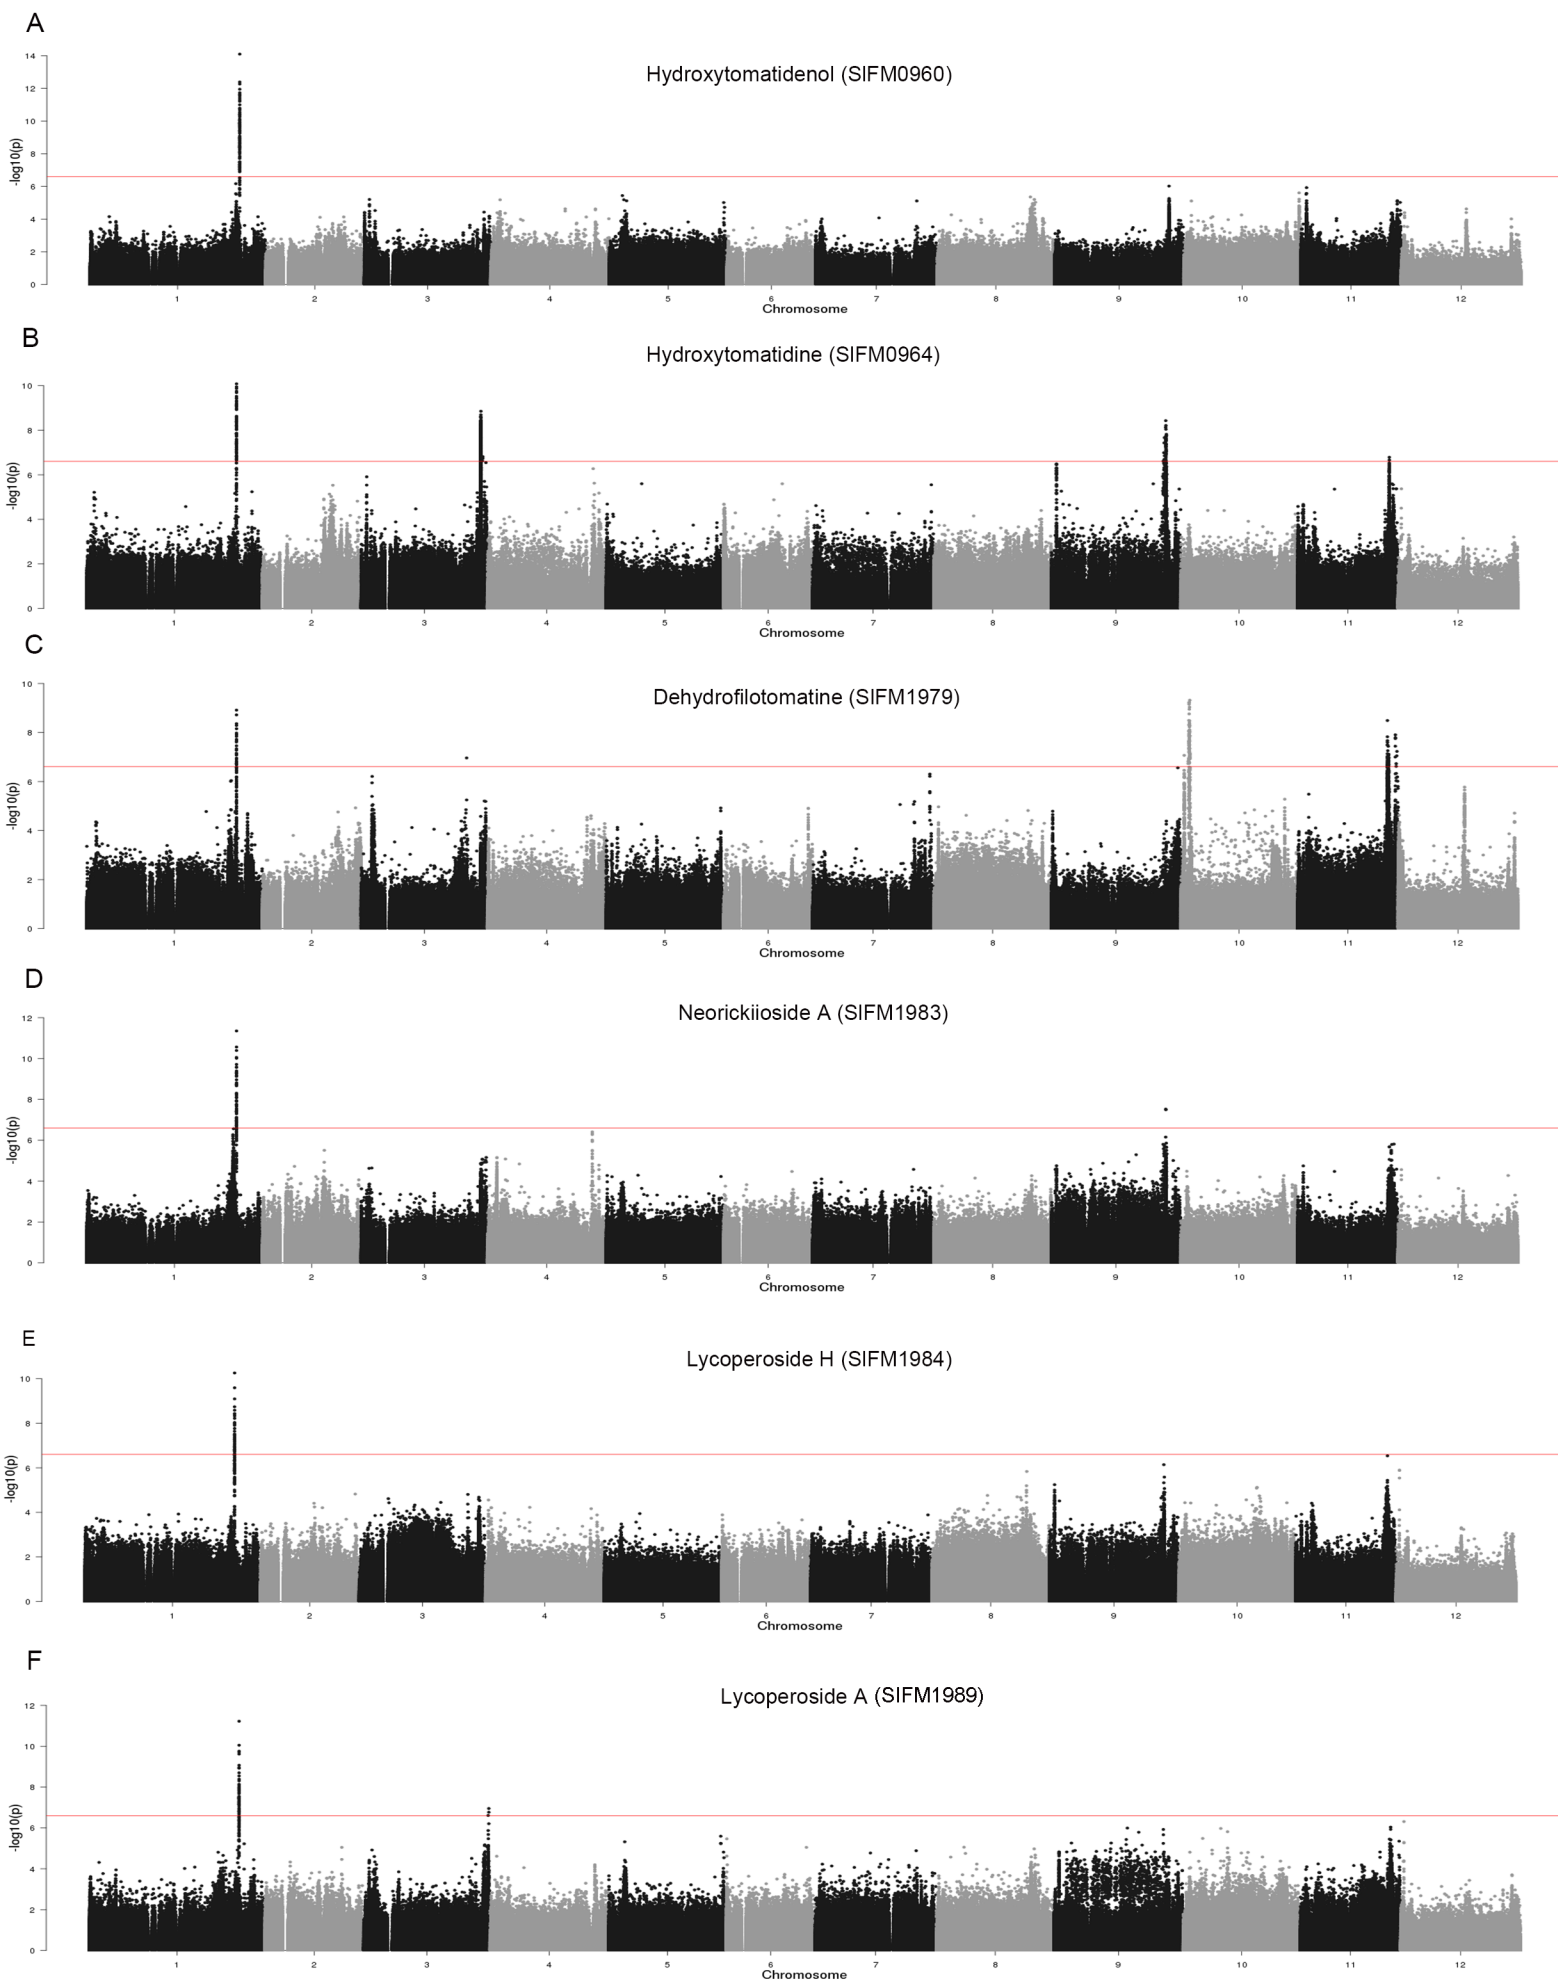

**Fig. S1.** Manhattan plots for GWAS on six SGAs contents. Horizontal dashed line indicates a genome-wide suggestive threshold of  $2.4 \times 10^{-7}$ .

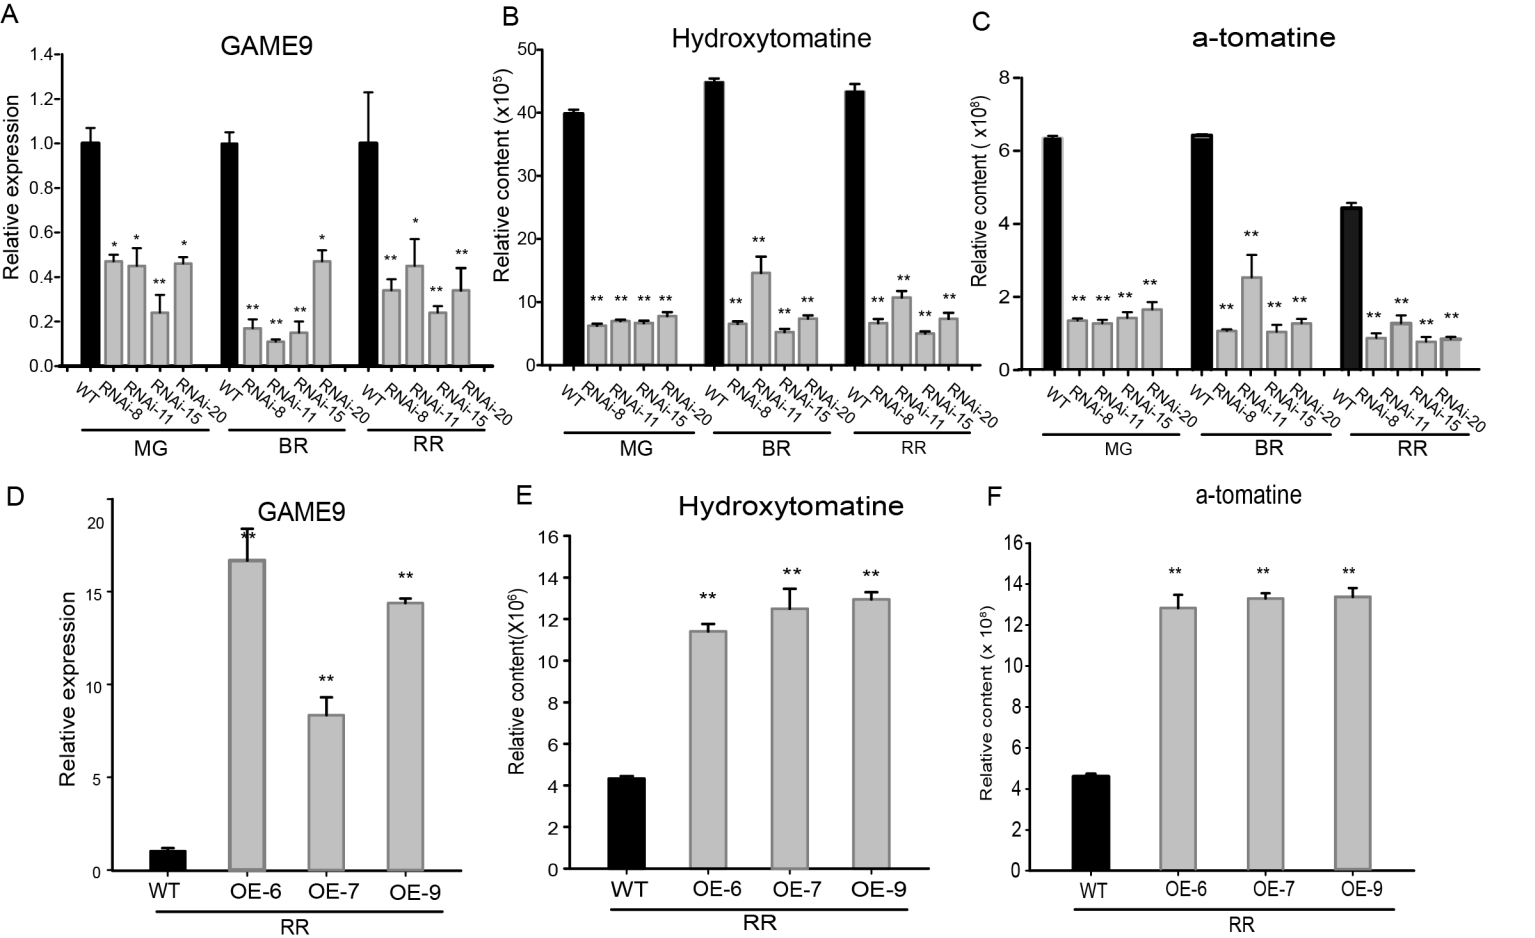

**Fig. S2. In vivo function of *GAME9*.** (A, D) *GAME9* gene expression (qRT-PCR) in the fruit tissue of *GAME9*-RNAi (silencing) and *GAME9*-OE (overexpression) lines. WT: wild-type (TS-286), independent *GAME9*-RNAi lines (8, 11, 15, 20), independent *GAME9*-OE lines (6, 7, 9). (B, E) Hydrotomatidine levels in the fruit of *GAME9*-RNAi lines (B) and *GAME9*-OE lines (E). (C, F) Levels of a-tomatine in the fruit of *GAME9*-RNAi lines (C) and *GAME9*-OE lines (F), quantified using LC-MS. MG, Mature Green; BR, breaker; RR, red ripe. Values represent means  $\pm$  S.E. (n=3). Asterisks indicate statistically significant differences that were determined using a Student's t-test. \*P-value < 0.05; \*\*P-value < 0.01.

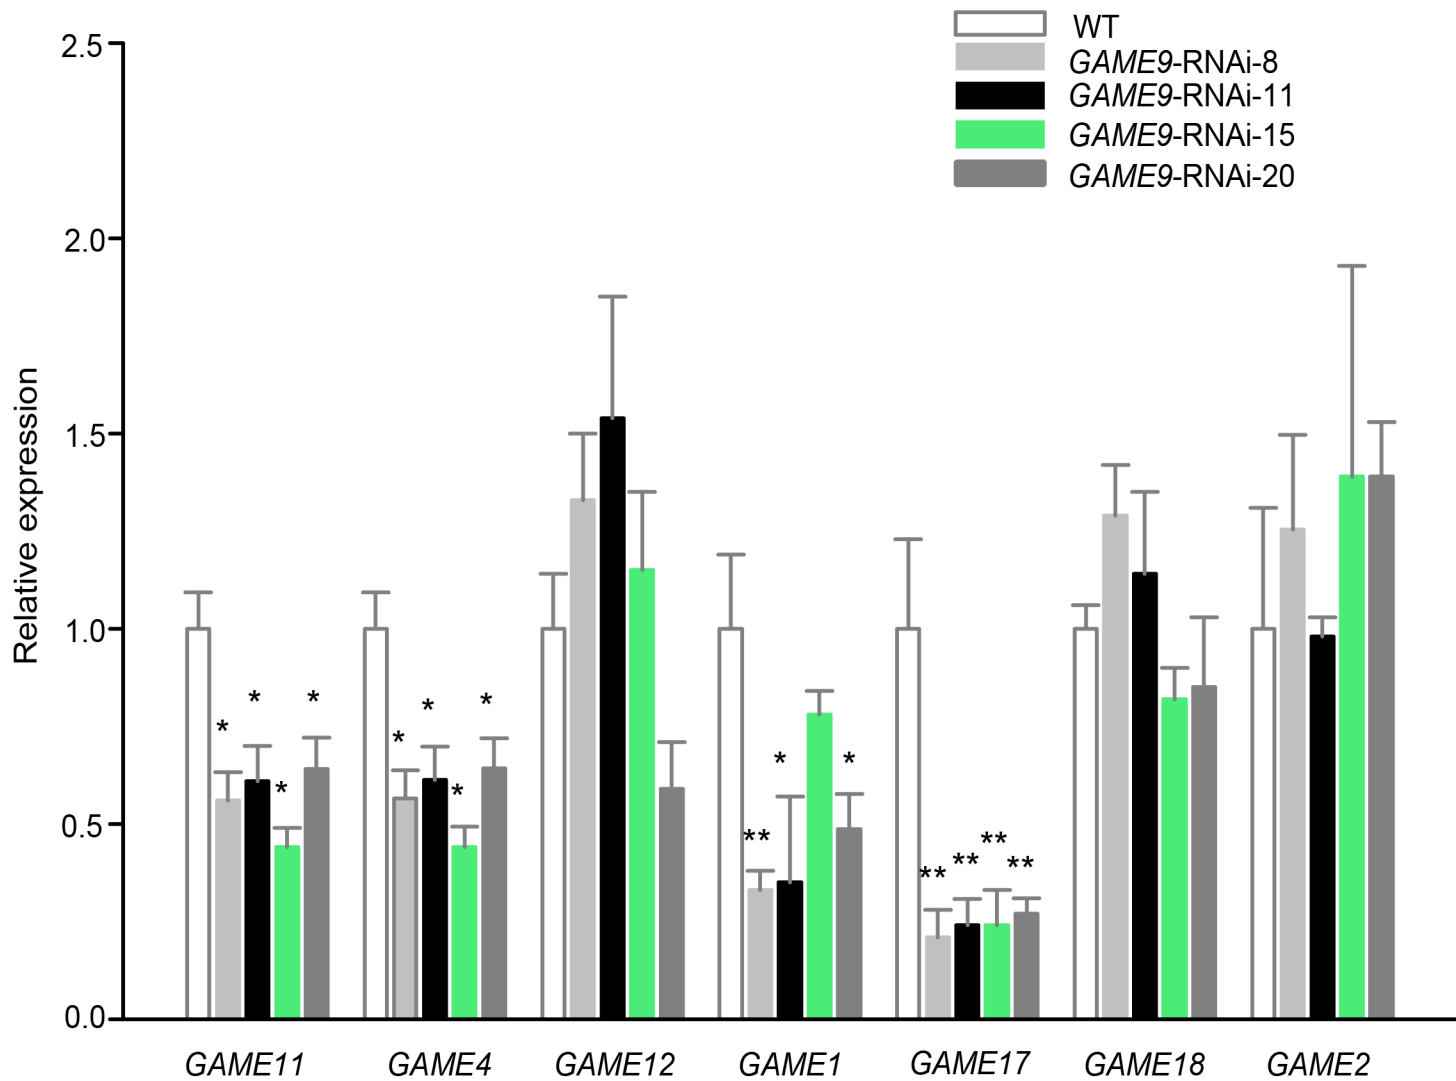

**Fig. S3. SGA pathway related gene expression at the mature green fruit stage in *GAME9*-RNAi lines.** Values represent means  $\pm$  S.E. (n=3). Asterisks indicate statistically significant differences relative to wild type (TS-286) that were determined using a Student's t-test (\*P-value < 0.05; \*\*P-value < 0.01).

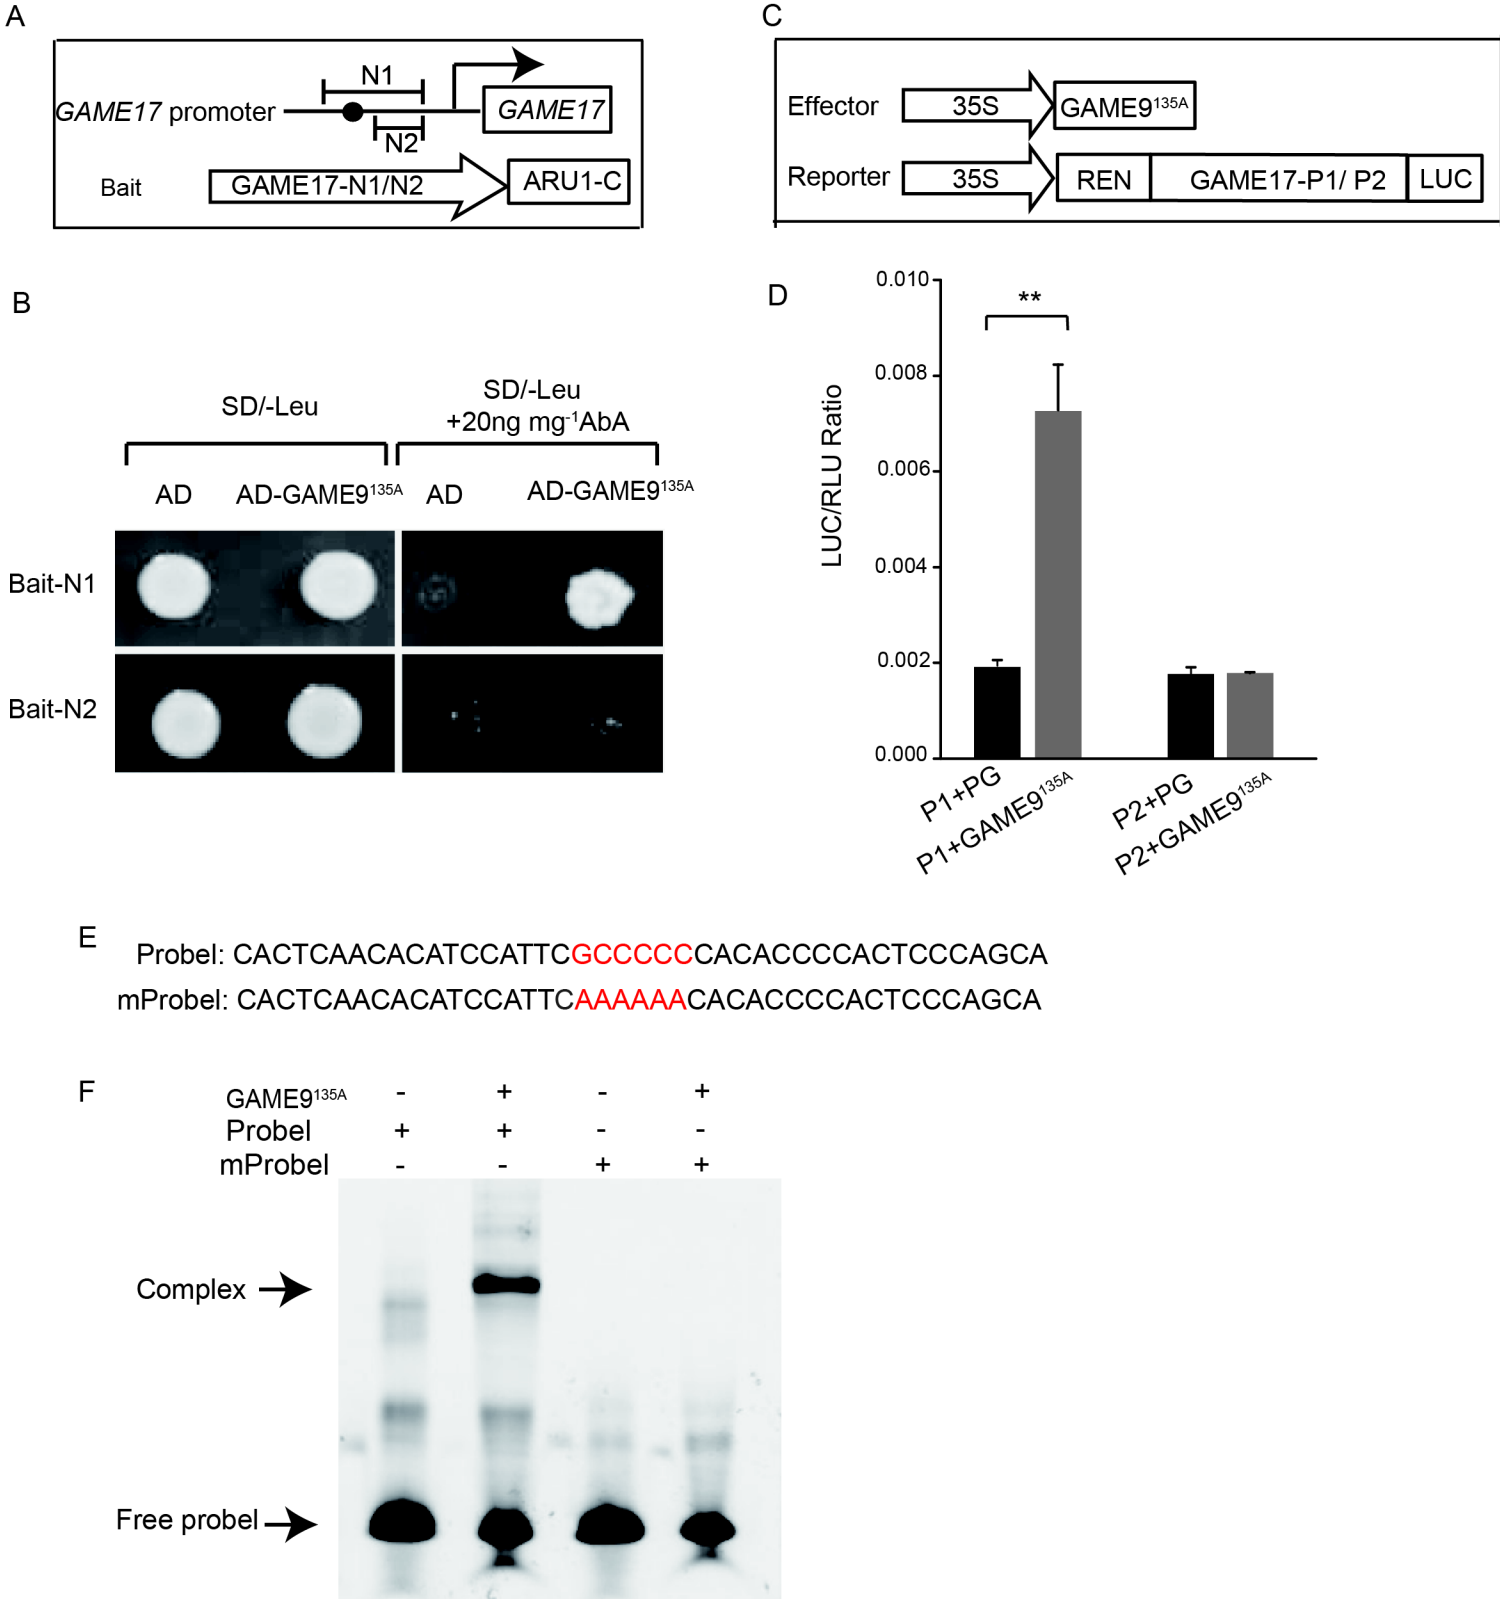

**Fig. S4. GAME9<sup>135A</sup> binds the GAME17 promoter and activates its expression.** (A) Schematic diagrams of the *GAME17* promoter and reporter constructs used for the Y1H assays. The circles indicate the cis-acting element, GC-rich element (-724 to -717 bp) within the *GAME17* promoter. N1 (-898 to -378 bp) and N2 (-666 to -378 bp) indicates the two promoter fragments of *GAME17* that were cloned into the bait plasmid pAbAi. (B) Binding of GAME9<sup>135A</sup> to the *GAME17* promoter in yeast-one hybrid (Y1H) assays. The bait vector and the empty pGADT7 were co-transformed into Y1Gold as a negative control. All transformants were grown on a selective medium containing (left) or lacking (right) 20 ng mL<sup>-1</sup> antibiotic (AbA). (C) Schematic diagrams of constructs used for the dual luciferase assay. Two promoter fragments from *GAME17*—P1 (-898 bp to the translational start codon) and P2 (-671bp to the translational start codon)—were cloned into pGreen II 0800-Luc to create reporter constructs. The full-length open reading frame of GAME9<sup>135A</sup> was cloned into pGreen II 62-SK to create the effector construct. (D) Transcription activity assay in tobacco. This assay tested for interactions between GAME9<sup>135A</sup> and the *GAME17* promoter. The P1 and P2 fragments and the pGreenII 62-SK empty vector (PG) were used as controls. LUC, firefly luciferase activity; RLU, Renilla luciferase activity. Bars indicate means ± S.E (n=5). Asterisks indicate statistically significant differences that were determined using a t test. \*\* P < 0.01. (E) Wild-type and mutant probes were used for EMSAs. The wild probe was synthesized based on the *GAME17* promoter sequence. The cis-element sequence was replaced with AAAAAA in the mutant probe. The hypothetical cis-element is indicated with red letters. (F) In vitro binding of GAME9<sup>135A</sup> to the promoter of *GAME17*. -, absence; +, presence. The protein-DNA complex and free probe are indicated.

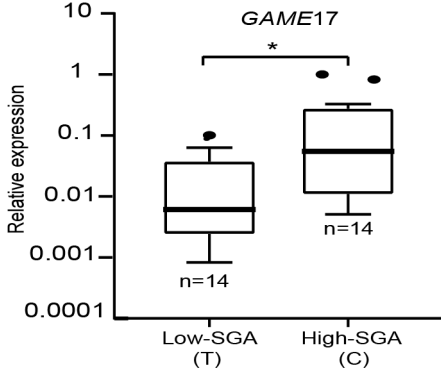

**Fig. S5.** The relative expression of *GAME17* in red ripe tomato fruit. n refer to the number of appropriate genotype of tomato accessions were used in this study, the middle line of the box indicates the median, the box indicates the range of the 25th to 75th percentiles of the total date, the whiskers indicate the interquartile range and the outer dots are outliers. Asterisks indicate statistically significant differences that were determined using a t test. \*P < 0.05.

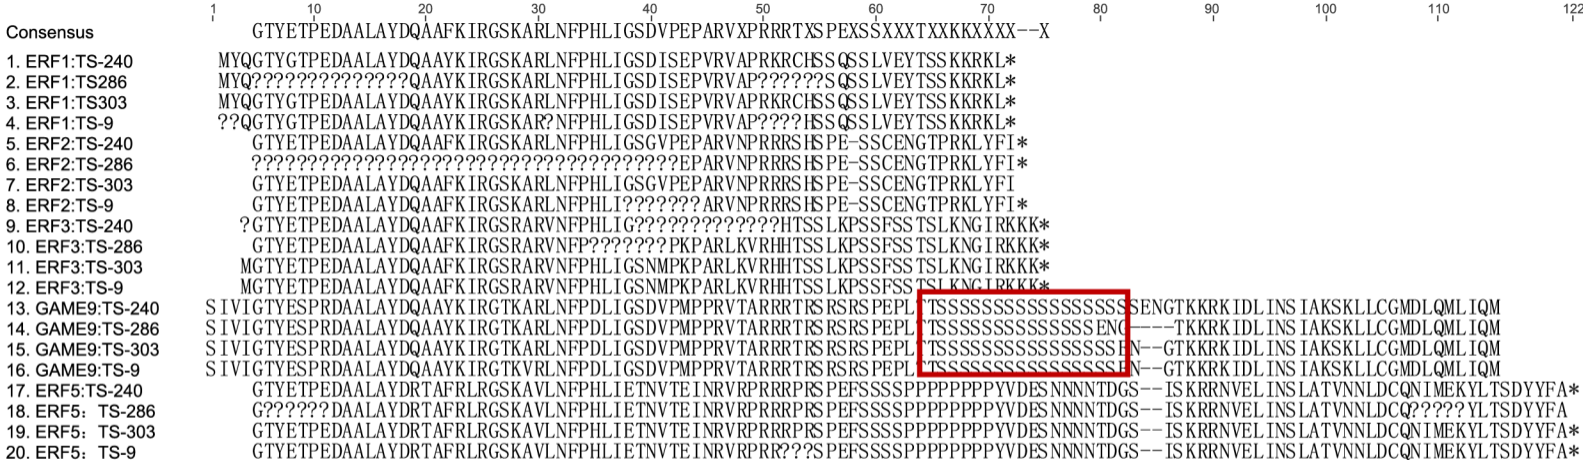

**Fig. S6. Alignment of GAME9 amino acid sequences.** Amino acid sequences of GAME9-like proteins amplified from resequencing data of different tomatoes (TS-240, TS-286, TS-303 and TS-9) were aligned with the Geneious. The serine-rich C-terminal domains are highlighted with a red box. ERF1, ERF2, ERF3 and ERF5 are GAME9-like genes in this tandem duplication.

**Table S1. Primers used in this study.**

| name                  | sequence                                                   | note                                    |
|-----------------------|------------------------------------------------------------|-----------------------------------------|
| <i>GAME17</i> -FW1    | AGCTTGAATTCGAGCTCGGTACC<br>CAAGACGCAACATGAATTTAACTCC       | Y1H(N1)                                 |
| <i>GAME17</i> -RV1    | ACATACAGAGCACATGCCTCGAG<br>CGACACATGAAATTTTGAAATTCAA       | Y1H(N1)                                 |
| <i>GAME17</i> -FW2    | AGCTTGAATTCGAGCTCGGTACC<br>GTGAAAAGGTAGTAAATTCTTCTTC       | Y1H(N2)                                 |
| <i>GAME17</i> -RV2    | ACATACAGAGCACATGCCTCGAG<br>CGACACATGAAATTTTGAAATTCAA       | Y1H(N2)                                 |
| <i>GAME9</i> -Fw      | CATTAACAACCTTCGTCCTCGTCATC                                 | qRT-PCR                                 |
| <i>GAME9</i> -Rv      | ATCCCACAAAGTAATTTGGATTTTG                                  | qRT-PCR                                 |
| <i>GAME18</i> -Fw     | TAGCTTATGGCCACATCACACCTTT                                  | qRT-PCR                                 |
| <i>GAME18</i> -Rv     | TTGCCTTGATGAAGCTAAGATTGAT                                  | qRT-PCR                                 |
| <i>GAME1</i> -Fw      | AAAACCTCCATGTTCTGTTCCTTCC                                  | qRT-PCR                                 |
| <i>GAME1</i> -Rv      | GAGGGGTAGTGAGGATTGTGGCTTT                                  | qRT-PCR                                 |
| <i>GAME17</i> -Fw     | TCTAGTCGCGGAAGTGCTAAAAATA                                  | qRT-PCR                                 |
| <i>GAME17</i> -Rv     | TATCACCTTCTCCGATGCCATTAA                                   | qRT-PCR                                 |
| <i>GAME2</i> -Fw      | ATGGCGATGGAAGAGAATGAACAAA                                  | qRT-PCR                                 |
| <i>GAME2</i> -Rv      | GCCATGGAAGGCCAAGAGTCTAGCA                                  | qRT-PCR                                 |
| <i>GAME4</i> -Fw      | TAGCCTTGTTCTTCATAGCTTTAAT                                  | qRT-PCR                                 |
| <i>GAME4</i> -Rv      | TGTTTGAACAAAATTTGATTGCATA                                  | qRT-PCR                                 |
| <i>GAME12</i> -Fw     | ATTCATTTCTTGCTTTATCTTTCT                                   | qRT-PCR                                 |
| <i>GAME12</i> -Rv     | AACATATCATGTCCATAAAATCCAT                                  | qRT-PCR                                 |
| <i>GAME6</i> -Fw      | TAGCTTTGGCCATATTTTTTCCTTT                                  | qRT-PCR                                 |
| <i>GAME6</i> -Rv      | CATAGATTCCTTGATGACGCAGTTC                                  | qRT-PCR                                 |
| <i>GAME11</i> -Fw     | GATCTAATGGATGAAGCAATGAAAG                                  | qRT-PCR                                 |
| <i>GAME11</i> -Rv     | CCCCTATTGGTATTATTAGCTGCAT                                  | qRT-PCR                                 |
| <i>GAME7</i> -Fw      | TCCTCGTTTTTTACACACAAATTCA                                  | qRT-PCR                                 |
| <i>GAME7</i> -Rv      | CAATTGCTATGGCAGAACAACACAC                                  | qRT-PCR                                 |
| <i>GAME9</i> -OE-Fw   | CCTCGAGCACATATTATTCATCCAAAACAAGA                           | Cloning <i>GAME9</i><br>for OE          |
| <i>GAME9</i> -OE-Rv   | GGGTACCACACAATGACCTTGATGAGTCTATT                           | Cloning <i>GAME9</i><br>for OE          |
| <i>GAME9</i> -RNAi-Fw | GGGGACAAGTTTGTACAAAAAAGCAGGCT<br>TTTCCCAATGAGTTTAGATGTTAC  | Cloning <i>GAME9</i><br>for RNAi        |
| <i>GAME9</i> -RNAi-Rv | GGGGACCACTTTGTACAAGAAAGCTGGGT<br>TTACTCTAGGTGGCATAGGTACGTC | Cloning <i>GAME9</i><br>for RNAi        |
| <i>GAME9</i> -62SK-Fw | GCCGCTCTAGAACTAGTGGATCC<br>ACATTCATCACATATTATTCATCCA       | Used for transient<br>expression assays |
| <i>GAME9</i> -62SK-Rv | TTGGTACCGGGCCCCCCTCGAG<br>GTGAAAGAAGTGCATTTACACAATG        | Used for transient<br>expression assays |

|                                |                                                          |                                         |
|--------------------------------|----------------------------------------------------------|-----------------------------------------|
| Pro1 <i>GAME17</i> -Fw         | CACTATAGGGCGAATTGGGTACC<br>CAAGACGCAACATGAATTTAACTCC     | Used for transient<br>expression assays |
| Pro2 <i>GAME17</i> -Fw         | CACTATAGGGCGAATTGGGTACC<br>CGCACGTGAAAAGGTAGTAAATTCT     | Used for transient<br>expression assays |
| Pro <i>GAME17</i> -Rv          | TATGTTTTTGGCGTCTTCCATGG<br>GTGTGAAGATGTTGTGGAGTATAAC     | Used for transient<br>expression assays |
| GAME9 -Fw                      | GTACCAGATTACGCTCATATG<br>ACATTCATCACATATTATTCATCCA       | Y1H                                     |
| GAME9 -Rv                      | ATGCCACCCGGGTGGAATTC<br>GTGAAAGAAGTGCATTTACACAATG        | Y1H                                     |
| GAME17-FW                      | CACTCAACACATCCATTC <u>CCCCCCC</u> CAC<br>ACCCCACTCCCAGCA | EMSA                                    |
| GAME17-RV                      | TGCTGGGAGTGGGGTGT <u>GGGGGG</u> CGA<br>ATGGATGTGTTGAGTG  | EMSA                                    |
| GAME17-FW<br>(mutated element) | CACTCAACACATCCATTC <u>AAAAAAC</u> CAC<br>ACCCCACTCCCAGCA | EMSA<br>(negative control)              |
| GAME17-RV<br>(mutated element) | TGCTGGGAGTGGGGTGTG <u>TTTTTT</u> GAA<br>TGGATGTGTTGAGTG  | EMSA<br>(negative control)              |
| Pro <i>GAME7</i> -FW           | CACTATAGGGCGAATTGGGTACC<br>GAGGCAAAGATGACTCTCTGTATGA     | Used for transient<br>expression assays |
| Pro <i>GAME7</i> -RV           | TATGTTTTTGGCGTCTTCCATGG<br>TTTGTGTTGAGTTGAATTTGTGTGTA    | Used for transient<br>expression assays |
| Pro <i>GAME4</i> -FW           | CACTATAGGGCGAATTGGGTACC<br>GAATCTGATACTACTAATATTAAT      | Used for transient<br>expression assays |
| Pro <i>GAME4</i> -RV           | TATGTTTTTGGCGTCTTCCATGG<br>TGTTCTCTCTCTCTATTTTTTTTC      | Used for transient<br>expression assays |
| Pro <i>GAME18</i> -FW          | CACTATAGGGCGAATTGGGTACC<br>TGATTTCTAGGTATTAGCAATGCAA     | Used for transient<br>expression assays |
| Pro <i>GAME18</i> -RV          | TATGTTTTTGGCGTCTTCCATGG<br>CACTTGTGTCTCTGTATTTTTTTCT     | Used for transient<br>expression assays |
| Pro <i>GAME1</i> -FW           | CACTATAGGGCGAATTGGGTACC<br>GGCTAGATCCCTGAGATGTTAATTA     | Used for transient<br>expression assays |
| Pro <i>GAME1</i> -RV           | TATGTTTTTGGCGTCTTCCATGG<br>TTTTACTACCCAATACAAAGAACA      | Used for transient<br>expression assays |
| Pro <i>GAME12</i> -FW          | CACTATAGGGCGAATTGGGTACC<br>CACCGATCTTTGGAAAAAACTCATT     | Used for transient<br>expression assays |
| Pro <i>GAME12</i> -RV          | TATGTTTTTGGCGTCTTCCATGG<br>TCCTTGAAGCTTTTTGAAAAATTA      | Used for transient<br>expression assays |
| Pro <i>GAME6</i> -FW           | CACTATAGGGCGAATTGGGTACC<br>TTTTTGTGCGTGTATGAGCTTTC       | Used for transient<br>expression assays |
| Pro <i>GAME6</i> -Rv           | TATGTTTTTGGCGTCTTCCATGG<br>GTGTTTGTCTCTCTCCCTTTGC        | Used for transient<br>expression assays |



---

|                       |                                                       |                                         |
|-----------------------|-------------------------------------------------------|-----------------------------------------|
| Pro <i>GAME11</i> -FW | CACTATAGGGCGAATTGGGTACC<br>GGACCCAACCCGATTTATGTTCTAC  | Used for transient<br>expression assays |
| Pro <i>GAME11</i> -RV | TATGTTTTTGGCGTCTTCCATGG<br>TGACAATCAATCTAAACCAAAACCA  | Used for transient<br>expression assays |
| Pro <i>GAME2</i> -FW  | CACTATAGGGCGAATTGGGTACC<br>TTTGAACCCTTACCCTAATTCTCTG  | Used for transient<br>expression assays |
| Pro <i>GAME2</i> -RV  | TATGTTTTTGGCGTCTTCCATGG<br>TTTCACTACATTTGAACTTGTTCCCT | Used for transient<br>expression assays |
| Pro <i>GAME17</i> -Fw | TGCATCCAACGCGTTGGGAGCTC<br>CAAGACGCAACATGAATTTAACTCC  | Used for GUS<br>activity assays         |
| Pro <i>GAME17</i> -RV | GCCTTCGCCATTCTAGACTCGAG<br>GTGTGAAGATGTTGTGGAGTATAAC  | Used for GUS<br>activity assays         |
| GUS-FW                | AAGTGTCGGTCGTGGATGAG                                  | Used for GUS<br>expression assays       |
| GUS-RV                | AGTCCGTCGTTACCAGTTC                                   | Used for GUS<br>expression assays       |
| Q-actin-FW-1          | GTCCTCTTCCAGCCATCCAT                                  | qRT-PCR                                 |
| Q-actin-RV-1          | ACCACTGAGCACAATGTTACCG                                | qRT-PCR                                 |

---

**Table S4. The GC-rich motifs found in the promoters of *GAME4*, *GAME7*, and *GAME17*.** The presence of GC-rich motifs (yellow) used in the transactivation assays and the coding sequence (red) are highlighted.

**Solyc12g006460**

**Cytochrome P450 (*GAME4*)**

>SL2.50ch12:939904..934011

GAATCTGATACTACTAATATTTAAATTTAAAGCCAACAACCCCGCAAATAAATCTTCA  
 CGTGACCAATGCATCAAGTGGAAATTTATTTAAATTTAAATACGACAAGATATGTAGAA  
 AATTATTGTTACAAAAATTAGAAAGAAACAAAGTCCATCTTTGAATTCTCTCACATAA  
 AATATTGGGACCCAACGTTAGAAACATTATTGTTATGGCAAAGAAAAAATCGGTTA  
 TCATCGACGTATCTGATCCAGTAGATAAGATTATTTCTCTCGTTAATCGTAGGTTTTGA  
 ATTTGATTTTTTAGTATTAATAAAAAATTTTTGGTAAGAAATGTCTTCCCTATCCTTCT  
 AATGGAATCCTATGTAGCGCGAATTCGAAATAGTCTAATTTCAATTTAATTATTAAC  
 ACAAATGAAAATAAAAAACAAAAATCCTCATTTTACTAATAATCATAATAATGATGT  
 AGAAATTATTAGCTAATCCCAAATATTAATCATAAATAAAATTTAACTAATAATCAA  
 AATAAATATTATATATAAACCAACAATCAAAACAAAAACTCATAGTATAAGACAGTA  
 CAACAAGTGTAAGGTTGTGTAAGGCTTTTAGGTTTCTAGTCAAATAACTATGATTT  
 TTCTTCAAAAATATCTTAAAGAATTATATATAATCAATATATGATTTTTTCATTTTTT  
 TTGGTTTATTATTATTTAGTTTTTCCCTTCTTTTAATTTTTTCCATACCTTTTGTCCGT  
 AATCATGGACCATATCATTATTTGTTAACTGAAATGACAAAAATAACCAAATTTAA  
 CAGCTAACATAAATAAGTTTTTCTCAAATTCACAACACATTTAAACCTTTTCATTT  
 AAAAAAAAAACAATTTCTTTAATAATTTTACAAAATCGAAAATATATTTAGTTTATCAA  
 TAATGAAACCTTTTAACGAAAGT**TGGGGGGCTA**AATTATATTCACGIGATTGTATTTT  
 TTTTTTAATTGCACTTCTATTAAGGAATAAAATTATAAAGATTTAACTATCTTTGAAA  
 GTAAAAAGGTTAGTATTGTCTTTTACATATTTGGTCTCATCATTATTGTTGCCATATT  
 TTTTAGATAAATAAATGTAGCCATTTACTACCTCCAATCAAATTCACAAATCCATCC  
 AAATTATTCAAAGAAAAAAAATAGAGAGAGAGAACA**ATGGATTCTACAATTTAGC**  
**CTTGTCTTCATAGCTTTAATACTTGGAAATTTTACATTTTATGCCATATTAATGAGAA**  
**TAAATGGTTGGTATTATGCAATCAAATTTGTTCAAACAAATATAACATCCCAAATGG**  
**TTATATGGGTTTGCCATATTTGGTAACACACTTTCTTACTTCAAAGCTTCAATGTGTG**  
**GTGATCCAAAATCATTCAATTGATTTCTTTGCTACTAGGTTTGGAGAAGGAGGAATGTA**  
**TAGGGCATAATTTGGGAAGCCAACAATTATGGTGACAAAGCCAGAAATAATTAG**  
**AAAAGTTTTGATGGATGAAGAGTATCTTGAAAGAGGTTTGCCTAATTATATGAAAAA**  
**ATTAATTGGATTAACAACCTTCGATAGAAGAAGACAAATATTTTCGTAGATTAACAGC**  
**ACCAGTAAAAAGTCATGGATTATTATCTGATTATTTGATTATATCGATAAAACTGTG**  
**AGTTCTACATTAGAGAAATACGCTACTACGGAAGAACCTGTTGAGTTTCTTCATAAAA**  
**TGCACAAGCTTACGTTGAGGTGTTTATGAGACTTTTAATGGTGATGAAGTTAATCA**  
**AGAATTATTTGATGAAATGTTTGGAGGAGATTACTGCTGTAATTAGTGGTGTTCACAAT**  
**TTGCCAATTAATCTCCAGGATTTGCTTATCATAAGGGACTCAAGGCTCGAAAAGTAC**  
**TAGGAGAGGTATTTAAAAAATTAATTGATGAAAGAAGAGAAGCCATGAAGGATGGA**  
**AAATCAATGCCAAAGGCAAACATAATTGATATGTTGTTATCAAACAACAATCAAGAT**  
**TATGAAGCAAACATGTTGAGTGACAAGAAGATCATTGAAATCCTAGTTTTGTTTTCAT**  
**TTGCTGGTTTTGAACCTGTTGCTCTTATGTCTGTCAAGGCAATTTTCCACTTACAAAAA**

CATCCACATTTCTTGGAAAAAGCCAAAGAGGAAACAAGAGGAAATAGTAAAGAGAAG  
AGCATCTTCAAATGCTGGACTTAGTTTTGATGAAATTAGACAAATGACATTTGTTAGT  
AAGATAATTAATGAAACGTTACGTATAGCTACTGATCAGTCGGTATTCCTTAGAGACA  
CAAGTACTACTTTTAAACATAAATGGGTACACCATACCCAAAGGGTGGAAAGTTTTTTGC  
AGTTGTATGGAATATTCATATGAATCCTGATGTTTATGTTCAACCTAAGGAATTTAAT  
CCTTCGAGATGGGATGATATTGAAACTAAGCCAGGCATTTTTCTACCTTTTTCAATGG  
GCCCCAAATCATGCCCAGGATCCAATTTGGCCAAGCTCAAATTTTCAGTAATTCTTCA  
TTATTATCTTCTTCACTACAGGGTTGAGCAAATTAATCCAGAGGCTAGATGTTATCCT  
CCTGAAAATTGTCTTGTGAAATTCAAGAAGCTATCGATCTCTAGTAATGGTAATTA

**Solyc07g062520**

**CYP72(*GAME7*)**

>SL2.5ch07:65219309..65223512

GAGGCAAAGATGACTCTCTGTATGATCCTACAAAGCTTCTCTTTTGAATTGTCTCCATCC  
TACACACATGCGCCTCAACCCCTACTTACCATTCATCCTCAGTATGGTGCTCCTCTTATT  
TTCCACAAACTATAATTCATATTACGTGAGGTATCTTTCACTTGTACGACTATACTGGAT  
ATGTTATTGTTTCAGACAAACTCAATAACTCTTGTTTAAACCTTTTATCTGTACCAGAGAA  
TAAATAACATGTTGCAAATTATATACAAATCATCTCAAGAACCAATGAGAAGCTTATTGT  
TATGACAAATTTAGATATATTCTACAAACACATTAAGCTAAAGAATTTGTGGAAAAATA  
ACTGTTTTTTTTTTGGTCACAATAAAAACATGTGACATGCTAGTAAGCAGTAAGCACA  
GCCGGCCTTTTTGGCAATGAAACCACTACATACACTTGTACACTAATTCTTTTTTCATTT  
TTTAAACTAAAATTATGAATGTCAGAATACGAAATAACAAGTAAAAACAACGAAAAT  
GATTAATAATATAAGAGAAAATCAGAGCCACTCATTGGTGTCTTTGCTCATCATTGTTG  
ACGACGTCGTTTGTAGTTCCCAGAGACATAGTATATATAAATTAATACTCCTCGTTTTTT  
ACACACAAATTCAACTCAAACAAAATGGACGAAATTCAAATATTAGTAAGAGTGTGTT  
GTTCTGCCATAGCAATTGCTCTGTTTGTGTGTCTGTGGAAAGTACTAAATTGGGTTTGG  
CTCAATCCGAAGAAGTTGGAGAATTTGTTGAGGAAACAAGGGCTAAATGGGAACCTCT  
ACAAAATATTGTATGGGGATTTGAATGATTTTATTGGAATGATTAGGGAAGCTAGTTCAA  
AACCTATGAATTTGTCTGATGATATAGCTCCAAGATTGGTGCCTTTCTTTCTTGAGACCA  
CCAAGAAATATGGGAAAAAATGTTTTATATGGTTGGGTCCAAAACCACAAGTAATAATC  
ATGGACCTGAGCTTATTAAGGAAGTACTCTCGAAAACCTATTTGTATCAAAGCCCGG  
TGGAATCCATTTGCAGCATTATTGGTACAAGGACTAGCAACCTATGAAGAAGATAAAT  
GGGCCAAACATAGAAAAATTATCAATCCCGCTTCCATCTAGAGAAGCTTAAGCATATG  
CTCCCAGCTTTTCACTTGAGCTGTAAGTAAATGCTGAGCAAATGGGAAGATGCTGTTC  
ACTTGGCAGCTCTCGTGAGATAGATGTATGGCCTCACCTTCAGCAATTAACCTGTGATG  
TAATCTCTCGGACAGCTTTTGGAAAGTAGTTATGAAGAAGGTAGAAAGATTTTTGAACCT  
CAAACGGAACAAGCTCAGAATTTTATCGACGCTGTACGTGAAGTTTATATCCCAGGGCG  
GAGATTTTTGCCAACAAAGAGGAACAGAAGAATGAAGGAAATAAAAAACGAAGTTCG  
GACCTCAGTTAAAGGTATTATCGATAAAAAGAATGAAGGCAATGAAAGCAGGGAATGCC  
GATAATAATGAGGATCTGTTAGGCATATTGCTTGAATCAAATTTCAAAGAAATTGAACA  
GCACGGTAACAAGGATTTTGGAAATGAGCATCGAAGAAGTCATCGAAGAATGCAAGTTA  
TTCTATTTTGTGGCCAAGAACTACATCAGTCTTACTCGTGTGGACTCTGGTGTGTT  
GAGTCGGTATCAAGATTGGCAGACACAGGCCAGAGAAGAAGTCTTGCAAGTGTTTGA  
GAGTCGGAAACCAGATTTTGTATGGATTAATCATCTAAAAGTTGTAACAATGATCTTGT  
ACGAGTCATTACGGCTATATCCCCATTGATAACACTTAATCGACAGGTTAACGAAGAC

ATAGTATTAGGAGAATTGTGTCTACCAGCTGGTGTACTAGTCTCATTGCCAATGATCTTA  
TTGCATCATGATAAAGATATATGGGGTGAAGATGCAAACGAGTTCAATCCAGAGAGATT  
TAGAGAAGGAATATCAAGTGCAACAAAAGGTAAAGTTACATATTTTCCATTTTCATGGG  
GTCCAAGAATATGCATTGGACAAAATTTGCCATGTTAGAAGCAAAGATGGCTTTGTGT  
ATGATCCTACAAAGCTTCTCTTTGAATTGTCTCCATCTTACACACATGCTCCTAAATCC  
TTAGTAACCATGCAGCCTCAGTATGGTGTCTCCACTTATTTTGCACAAACTTTAG

Solyc07g043480

UDP-glucose glucosyltransferase (*GAME17*)

>SL2.50 ch07: 57268672..57270940

CAAGACGCAACATGAATTTAACTCCTTTTCATTATTTATTCTTTTCATTTTCAAGTAT  
ATATTTGGATGAAAATCATATCTTATAATTAATAAAATTTATTTATTATTTAAATCATCA  
CACATGACTTCTATTTAATTAATAAAAAGATATGTATTCACTCAACACATCCATT **CGC**  
**CCCCAC**ACCCCACTCCCAGCACCTATTTAACATACAGTACACCCATTATGCGCACGT  
GAAAAGGTAGTAAATTTCTTCTTCTTCTTCTATATAATAAAAAATAAAAACTAAATTTT  
TAAAATTTTATTTGTGTCATATAAATTGAAACAGTGAAAATAATGTATATTATTAGTG  
ACAATAATTAATGATAAACGACATTTGATTGAATTTTAAATTTCA *CACGTG*ATACATA  
GATTGAGATTATTATTTGACAATTAATAAATTAACAAATTACAATAACTGACAA  
CTAAATTTTTATTTTTATTAAGTTTGATTGAATTTCAAATTTTCATGTGTCGAATAA  
ATTGAGATAGAAATAGTTATATATATATATGTATATCAATTGAAAATTTTTAGAAG  
TATTATAAATCATAATGATTAATATATAATTTAAAGTAGTTAAAATTTAACATGATTC  
AAAATACATAAATTAATGGACTTATTTATGATATTTTCTTCTCAACACATTGAAGTAT  
ATATTTGGAAAAATGATGAATCTAAATTTTAGGCTGTCTGTTTAAATTATTATTTTCAT  
ATGCAAACATTAATAAATACGGTTGTTGGTATTCGGTAGTTGTTACTTCATATCTATAT  
ATCCTTGTTTAGAGTAACACTCCAATAAGTCTTCAAAAAAAAAAAAAAAAAATACTAATA  
GTTATACTCCACAACATCTTCACAC **ATGGATAACAAAGATGATGTAGCTGTTGTGATA**  
**GCTCCATTACATCTTCAAAGCCATCTCCGACAACCTTCTCCATTTTGCATGTAGAATTC**  
**CTCCTATGGTCTACCGGTCTACTATCTCGGCTTAGCCGCCTCTAACCGTGAAGCTAGG**  
**CAACACTCGACTACCTTAAATCCTTGTGACATAGAGAAAATCCACTTCCATGACCTCC**  
**AAATTCCTAATGAAGATCCTCCTCCAGATATCCCATGCATATTTGGCATGCTTCTATG**  
**CGAACACGTGAACCCATTGCTTCTTCTTGGAGATATCTCCTCAAAGGCAAGACGAA**  
**TTGTTGTTGTTTCATGATCTTTTAATGTCCTATAAATGTTTCAGGATATTTCTTCATATCCA**  
**ATGGAGAATCCTATGTATTTTCATTGCCTACCTATTTTCGATATGTATTGTAGTCACTAT**  
**GCCCCAGCTGCAGGATTCCTATTCCTACTTGAAGAAGCGCTTCTTAAAAGGCTACCTT**  
**CCAATGATGGATGTTACAACCCTGAGGATGTGGAGCACCATGCTAAGTATCTAAATC**  
**ATIGCATGGGCAAGAATGCTGGTGTATCTTTAACACAAGTCAAGTAATTGATGGTAC**  
**TGCTATTGTTGATTCCATGGCAAATCTTGCCACCATGCAAAAACAAAAGTTATGGGCA**  
**TTAGGACCAATTCTCCTTACACAAGATCATGATAAGGTCCAAACCAAACTTCTGTT**  
**TGGATTGGCTTAACAAACAGCCTCCTAAATCAGTTATTTATGTGCTTTTGGAACATCT**  
**ACTTCATTTTCAGCTGAACAAATCAAGGAGCTAGCAATTGGTTAGAGCTAAGCAAA**  
**CAAAAGTTCATATGGGTACTTAGAAATGCTGATGTAGGAGATCCTGTTAACAACAAA**  
**TGCGAAGAGAATAGATCAGGAACACTTGAGTTGCCAGAAGGATTTGAAGAAAGGGT**  
**AAAAGGGGTGGCTTAGTGGTGTGAGAGAATGGGCACCTCAACAAGAAATCTTCGCTCA**  
**TCCCTCTACTGGTGGCTTCATGAGTCACTGTGGATGGACTTCGTGTTAGAAAGCATT**  
**ATTGAAGGTGTGCCAATAGCCGCTTGGCCTATCCAATTTGATCAACCAAAAAATGCTT**

TTCTAGTCGCGGAAGTGCTAAAAATAGGGCTCCATGTTAGGGAGTGGGAGCAGCGGA  
ATGAGTTAGTGACTGCTTCCACCGTTCAAAATATAGTTTGCAAATTAATGGCATCGGA  
AGAAGGTGATATGATTAGGAAAAGAGCACAAAGAACTAAGGACGGCTGTAAAGCGGT  
CCACGGAGGAAGGTGGTGTTCCTCGAATGGAGTTGGATTCTTTCATCGCGCATATCAC  
AAGATAG
